# Supplementary material for: Roles of differential expression of microRNA-21-3p and microRNA-433 in FSH regulation in rat anterior pituitary cells
Source: PubMed Central journal article supplement (PMC5482676; doi:10.18632/oncotarget.16615), 2017-03-28
Supplement: oncotarget-08-36553-s001.pdf [file oncotarget-08-36553-s001.pdf]

## **Roles of differential expression of microRNA-21-3p and microRNA-433 in FSH regulation in rat anterior pituitary cells**

### **SUPPLEMENTARY MATERIALS**

#### **SUPPLEMENTARY TABLES**

##### **Supplementary File 1: Primers used in RT-PCR**

See Supplementary File 1

##### **Supplementary File 2: Construction of pmiR-FSHb-3'UTR-WT reporter plasmid**

See Supplementary File 2

##### **Supplementary File 3: Construction of pmiR-FSHb-3'UTR-MUT reporter plasmid**

See Supplementary File 3

##### **Supplementary Table 1: The 150 miRNAs predicted by TargetScan program**

See Supplementary Table 1
